# Supplementary material
Source: PubMed Central journal article supplement (PMC2917713)
Supplement: mmc1.pdf [file mmc1.pdf]

Supplemental Data

**Detecting Heteroplasmy from High-Throughput Sequencing  
of Complete Human Mitochondrial DNA Genomes**

Mingkun Li, Anna Schoenberg, Michael Schaefer, Roland Schroeder, Ivane Nasidze, and Mark Stoneking

**Table S1. Primers Used in the SnaPshot™ Validation**

| Position | Primers                       |                               |                               |
|----------|-------------------------------|-------------------------------|-------------------------------|
|          | Forward                       | Reverse                       | Extension                     |
| 203      | GTA TGC ACG CGA<br>TAG CAT TG | CTG TGT GGA AAG<br>TGG CTG TG | AGG CGA ACA TAC<br>TTA CTA AA |
| 8551     | CAC CTA CCT CCC<br>TCA CCA AA | GGG ATC AAT AGA<br>GGG GGA AA | ACG AAA ATC TGT<br>TCG CTT CA |
| 8743     | TAT TGA TCC CCA<br>CCT CCA AA | TCC GAG GAG GTT<br>AGT TGT GG | GAA CCT GAT CTC<br>TTA TAC TA |
| 11692    | CCA TCT GCC TAC<br>GAC AAA CA | GCG TTC GTA TGA<br>GTT TGC    | ACC CCC TGA AGC<br>TTC ACC GG |
| 11809    | CAC GGG CTT ACA<br>TCC TCA TT | GGG GGT AAG GCG<br>AGG TTA G  | CTC TCT CAA GGA<br>CTT CAA AC |
| 13359    | ACA TCT GTA CCC<br>ACG CCT TC | GCT AAT GCT AGG<br>CTG CCA AT | TTC AAA GCC ATA<br>CTA TTT AT |
| 14561    | CAA CCA TCA TTC<br>CCC CTA AA | TCC GTG CGA GAA<br>TAA TGA TG | TCA GAA TAA TAA<br>CAC ACC CG |
| 14770    | CCC CAC AAA CCC<br>CAT TAC TA | ATC ATG CGG AGA<br>TGT TGG AT | ATC CCA ATA CGC<br>AAA ATT AA |
| 15046    | GCC ATG CAC TAC<br>TCA CCA GA | ATG CCG ATG TTT<br>CAG GTT TC | CTC TTC CTA CAC<br>ATC GGG CG |



|             |    |   |   |   |   |   |   |   |   |   |
|-------------|----|---|---|---|---|---|---|---|---|---|
| <5%         | 8  | 3 | 0 | 0 | 0 | 3 | 0 | 0 | 0 | 0 |
| Coverage=72 |    |   |   |   |   |   |   |   |   |   |
| >50%        | 5  | 1 | 1 | 1 | 1 | 1 | 1 | 1 | 1 | 1 |
| 25%-50%     | 2  | 2 | 0 | 0 | 0 | 0 | 0 | 0 | 0 | 0 |
| 10%-24%     | 1  | 1 | 0 | 0 | 0 | 0 | 0 | 0 | 0 | 0 |
| 5%-9%       | 3  | 1 | 0 | 0 | 0 | 1 | 0 | 0 | 0 | 0 |
| <5%         | 8  | 3 | 1 | 0 | 0 | 4 | 0 | 0 | 0 | 0 |
| Coverage=74 |    |   |   |   |   |   |   |   |   |   |
| >50%        | 5  | 1 | 1 | 1 | 1 | 1 | 1 | 1 | 1 | 1 |
| 25%-50%     | 2  | 2 | 0 | 0 | 0 | 0 | 0 | 0 | 0 | 0 |
| 10%-24%     | 4  | 3 | 0 | 0 | 0 | 0 | 0 | 0 | 0 | 0 |
| 5%-9%       | 3  | 1 | 0 | 0 | 0 | 0 | 0 | 0 | 0 | 0 |
| <5%         | 11 | 1 | 1 | 0 | 0 | 3 | 0 | 0 | 0 | 0 |

---

**Table S3. Positions Having Minor Allele Frequency Differences Greater than 0.1 Between Replicates**

| Individual | Position | First replicate |    |              |    | Second replicate |    |              |    |
|------------|----------|-----------------|----|--------------|----|------------------|----|--------------|----|
|            |          | Major allele    |    | Minor allele |    | Major allele     |    | Minor allele |    |
| Az4        | 66       | G               | 70 | -            | 1  | G                | 72 | -            | 24 |
| Az4        | 309      | T               | 13 | C            | 8  | C                | 68 |              |    |
| Az4        | 311      | C               | 22 | T            | 5  | C                | 66 | T            | 2  |
| Az4        | 2457     | A               | 71 | -            | 1  | A                | 76 | -            | 13 |
| Az4        | 3006     | T               | 25 | C            | 7  | T                | 50 |              |    |
| Az4        | 3008     | C               | 21 | T            | 10 | C                | 56 |              |    |
| Az4        | 4715     | C               | 41 |              |    | C                | 63 | A            | 7  |
| Az4        | 11089    | A               | 35 |              |    | A                | 42 | C            | 5  |
| Az4        | 12417    | A               | 68 | -            | 3  | A                | 82 | -            | 26 |
| Az4        | 16077    | A               | 42 |              |    | A                | 62 | C            | 7  |
| Arm3       | 2458     | A               | 66 | -            | 3  | A                | 74 | -            | 16 |
| Arm3       | 4774     | T               | 51 | A            | 1  | T                | 42 | A            | 13 |
| Arm3       | 6820     | A               | 45 | C            | 1  | A                | 50 | C            | 7  |
| Arm3       | 9314     | A               | 47 |              |    | A                | 51 | C            | 7  |
| Arm3       | 10307    | A               | 36 | C            | 2  | A                | 49 | C            | 9  |
| Arm3       | 10619    | A               | 60 |              |    | A                | 57 | C            | 9  |
| Arm3       | 10793    | A               | 53 | C            | 1  | A                | 49 | C            | 9  |
| Arm3       | 12419    | A               | 66 | -            | 11 | A                | 87 | -            | 31 |
| Arm3       | 15767    | A               | 49 | G            | 1  | A                | 55 | C            | 9  |
| G65        | 257      | A               | 46 | C            | 8  | A                | 41 | C            | 2  |
| G65        | 303      | C               | 49 | A            | 1  | C                | 49 | -            | 7  |
| G65        | 309      | C               | 33 | T            | 8  | C                | 54 |              |    |
| G65        | 2804     | A               | 62 | C            | 11 | A                | 82 |              |    |
| G65        | 4773     | T               | 72 |              |    | T                | 50 | A            | 6  |
| G65        | 6691     | A               | 72 | -            | 1  | A                | 72 | -            | 10 |
| G65        | 10126    | A               | 65 |              |    | A                | 56 | C            | 9  |
| G65        | 10305    | A               | 53 | C            | 4  | A                | 46 | C            | 12 |
| G65        | 10791    | A               | 72 |              |    | A                | 53 | C            | 16 |
| G65        | 11081    | T               | 56 | A            | 9  | T                | 51 |              |    |
| G65        | 12417    | A               | 69 | -            | 3  | A                | 83 | -            | 27 |
| G65        | 14689    | A               | 71 |              |    | A                | 60 | C            | 7  |
| G65        | 15765    | A               | 75 |              |    | A                | 49 | C            | 12 |
| Az41       | 309      | C               | 39 | T            | 9  | C                | 51 |              |    |
| Az41       | 385      | A               | 60 | G            | 15 | A                | 66 | G            | 6  |
| Az41       | 4715     | C               | 81 | A            | 2  | C                | 60 | A            | 10 |
| Az41       | 4773     | T               | 75 | A            | 1  | T                | 43 | A            | 9  |
| Az41       | 6418     | A               | 83 | C            | 1  | A                | 56 | C            | 8  |
| Az41       | 7029     | A               | 78 |              |    | A                | 55 | C            | 8  |
| Az41       | 10791    | A               | 81 |              |    | A                | 48 | C            | 13 |
| Az41       | 11081    | T               | 62 | A            | 8  | T                | 50 |              |    |
| Az41       | 12417    | A               | 79 | -            | 9  | A                | 81 | -            | 21 |
| Az41       | 14689    | A               | 75 |              |    | A                | 57 | C            | 5  |

**Table S4. Number of Heterozygous Positions in the PhiX174 Sequence Reads, under Different Criteria**

|                                                      | No quality filter           | QS $\geq$ 20     | QS $\geq$ 23    |
|------------------------------------------------------|-----------------------------|------------------|-----------------|
| Validated by core and ends of the reads <sup>a</sup> | 40.3 $\pm$ 5.2 <sup>b</sup> | 5.24 $\pm$ 1.8   | 2.37 $\pm$ 1.15 |
| Validated by ends of the reads                       | 275.4 $\pm$ 38.3            | 76.7 $\pm$ 8.1   | 47.9 $\pm$ 11.3 |
| Validated by core of the reads                       | 267.2 $\pm$ 18.0            | 106.1 $\pm$ 11.3 | 74.5 $\pm$ 15.8 |

<sup>a</sup> Core of the reads is defined as the content from 6<sup>th</sup> position to 25<sup>th</sup> position of the read and the rest of the reads are defined as the ends of the read.

<sup>b</sup> SD based on 100 resamplings of the data.

**Table S5. False Positive Error Rate and False Negative Error Rate in Detecting Heteroplasmy by Unique Reads vs. All Reads**

| Unique reads |                     |                     |                     | Duplicate reads |                     |                     |                     |
|--------------|---------------------|---------------------|---------------------|-----------------|---------------------|---------------------|---------------------|
| Coverage     | False negative rate | False positive rate | Heteroplasmic level | Coverage        | False negative rate | False positive rate | Heteroplasmic level |
| 31           | 0.138               | 0.060               | 0.293±0.074         | 50              | 0.238               | 0.067               | 0.291±0.063         |
| 42           | 0.058               | 0.011               | 0.290±0.068         | 83              | 0.082               | 0.048               | 0.288±0.051         |
| 56           | 0.018               | 0.0012              | 0.285±0.059         | 167             | 0.0096              | 0.000801            | 0.284±0.038         |
| 61           | 0.0076              | 0.0012              | 0.281±0.055         | 250             | 0.0024              | 0.0016              | 0.281±0.031         |

**Figure S1. Electropherograms at the Heteroplasmic Positions by SnapShot™**

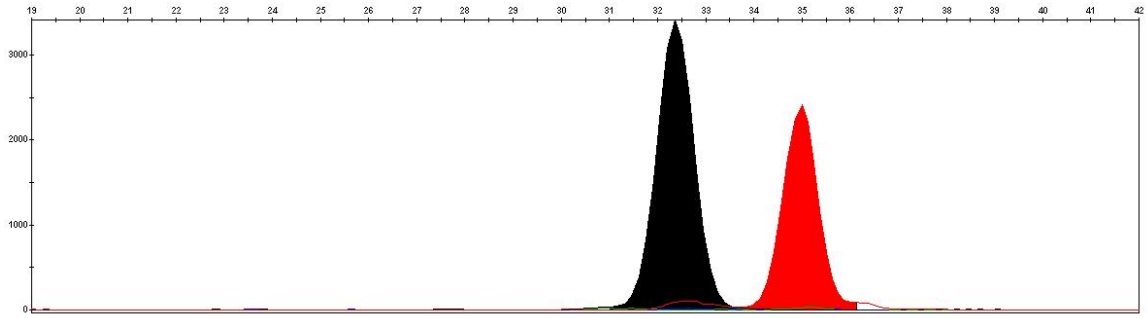

**Position 8551 Ir30**

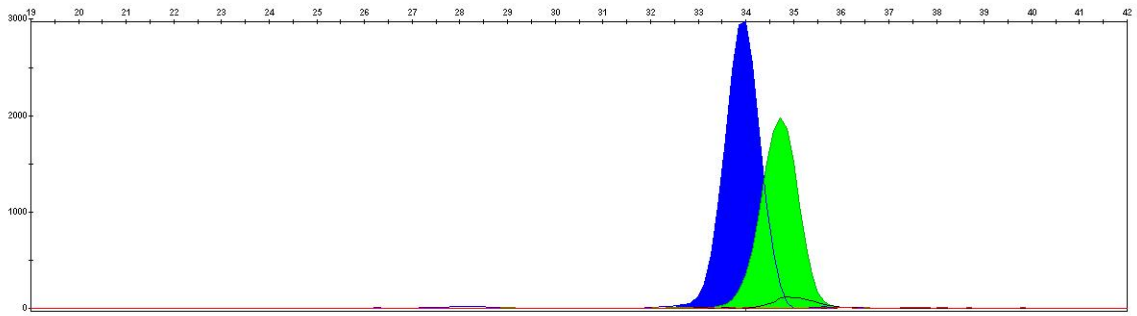

**Position 8743 Ir29**

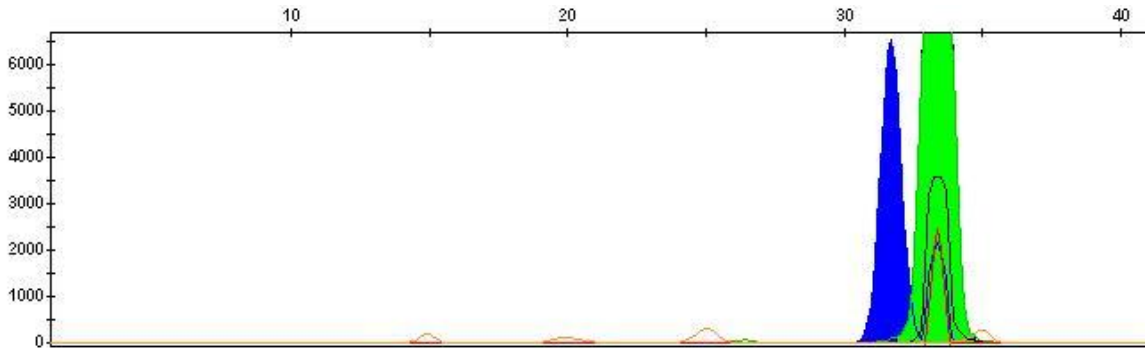

**Position 203 Az5**

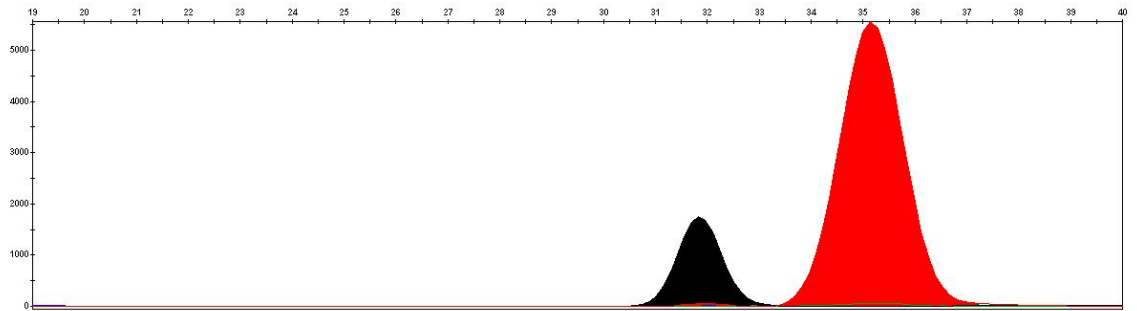

**Position 11809 G82**

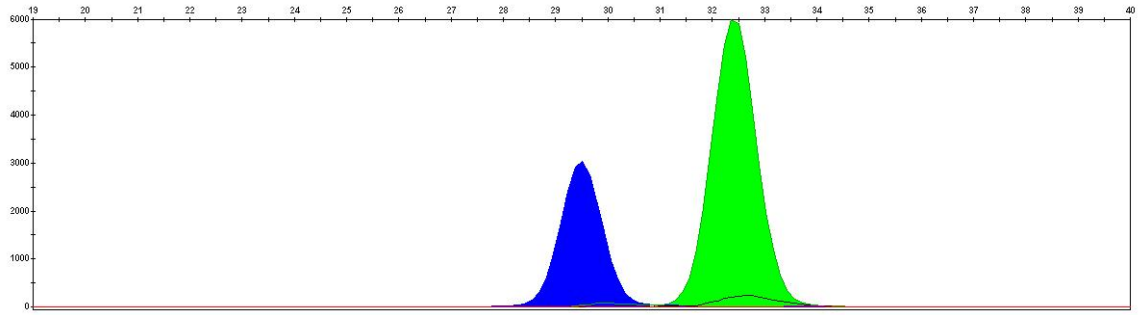

**Position 14561 T9**

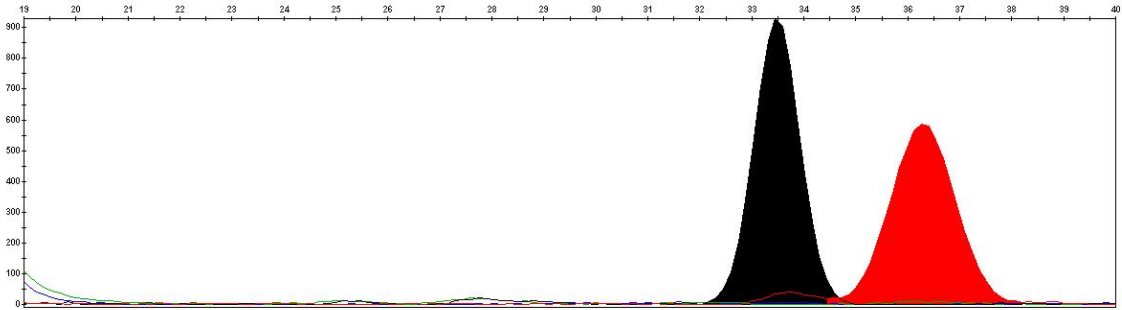

**Position 14770 Az14**

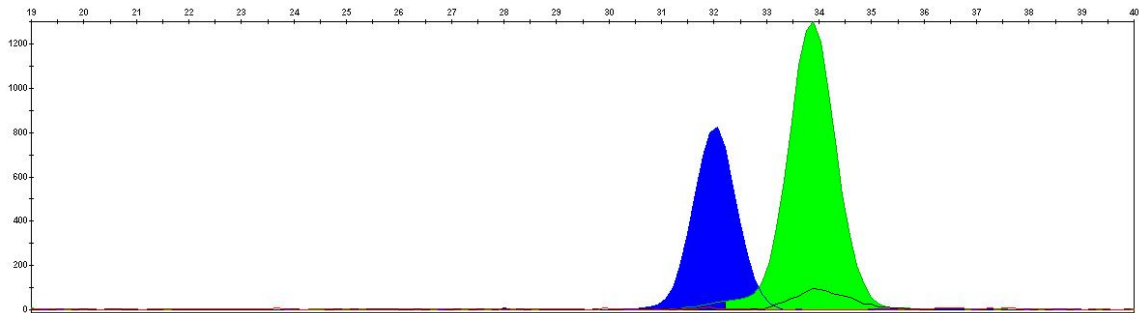

**Position 13359 Az3**

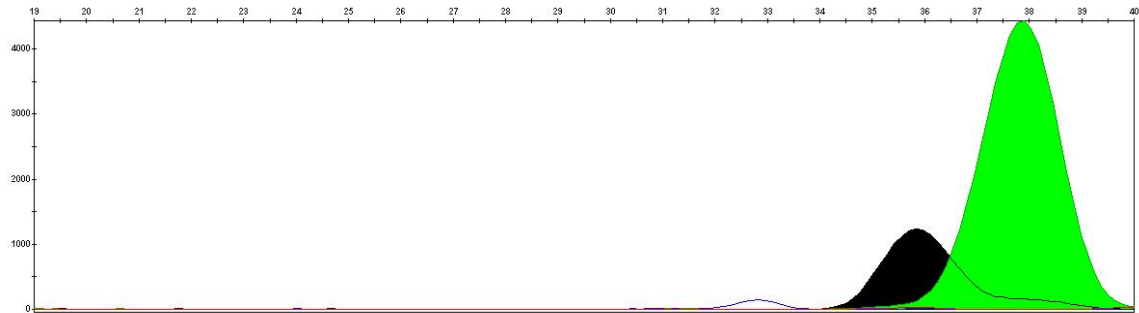

**Position 11692 G38**



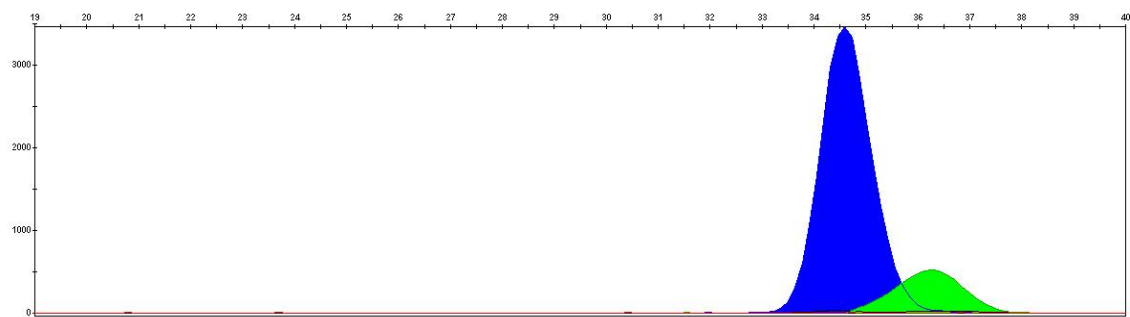

**Position 15046 T186**
